# Supplementary material for: Structural basis of selective cannabinoid CB2 receptor activation
Source: PubMed Central journal article supplement (PMC10017709; doi:10.1038/s41467-023-37112-9), 2023-03-15
Supplement: 41467_2023_37112_MOESM1_ESM.pdf [file 41467_2023_37112_MOESM1_ESM.pdf]

## Structural basis of selective cannabinoid CB<sub>2</sub> receptor activation

Xiaoting Li<sup>1\*</sup>, Hao Chang<sup>1,2\*</sup>, Jara Bouma<sup>3\*</sup>, Laura V. de Paus<sup>4</sup>, Partha Mukhopadhyay<sup>5</sup>, Janos Paloczi<sup>5</sup>, Mohammed Mustafa<sup>6</sup>, Cas van der Horst<sup>3</sup>, Sanjay Sunil Kumar<sup>3</sup>, Lijie Wu<sup>1,2</sup>, Yanan Yu<sup>1,2</sup>, Richard J. B. H. N. van den Berg<sup>4</sup>, Antonius P.A. Janssen<sup>4</sup>, Aron Lichtman<sup>6</sup>, Zhi-Jie Liu<sup>1,2#</sup>, Pal Pacher<sup>5#</sup>, Mario van der Stelt<sup>4#</sup>, Laura H. Heitman<sup>3#</sup> and Tian Hua<sup>1,2#</sup>

### Affiliations:

<sup>1</sup>iHuman Institute, ShanghaiTech University, Shanghai 201210, China

<sup>2</sup>School of Life Science and Technology, ShanghaiTech University, Shanghai, China

<sup>3</sup>Division of Drug Discovery and Safety, LACDR, Leiden University & Oncode Institute, the Netherlands

<sup>4</sup>Department of Molecular Physiology, LIC, Leiden University & Oncode Institute, the Netherlands

<sup>5</sup>Laboratory of Cardiovascular Physiology and Tissue Injury, National Institute of Health/NIAAA, Rockville, Maryland, USA

<sup>6</sup>Department of Pharmacology and Toxicology, Virginia Commonwealth University, Richmond, VA, USA

\*These authors contributed equally

#Coorespondence: [huatian@shanghaitech.edu.cn](mailto:huatian@shanghaitech.edu.cn) (T.H.); [l.h.heitman@lacdr.leidenuniv.nl](mailto:l.h.heitman@lacdr.leidenuniv.nl) (L.H.H); [m.van.der.stelt@chem.leidenuniv.nl](mailto:m.van.der.stelt@chem.leidenuniv.nl) (M.v.d.S.); [pacher@mail.nih.gov](mailto:pacher@mail.nih.gov) (P.P.) and [liuzhj@shanghaitech.edu.cn](mailto:liuzhj@shanghaitech.edu.cn) (Z.-J.L.).

## SUPPLEMENTAL FIGURES AND TABLES

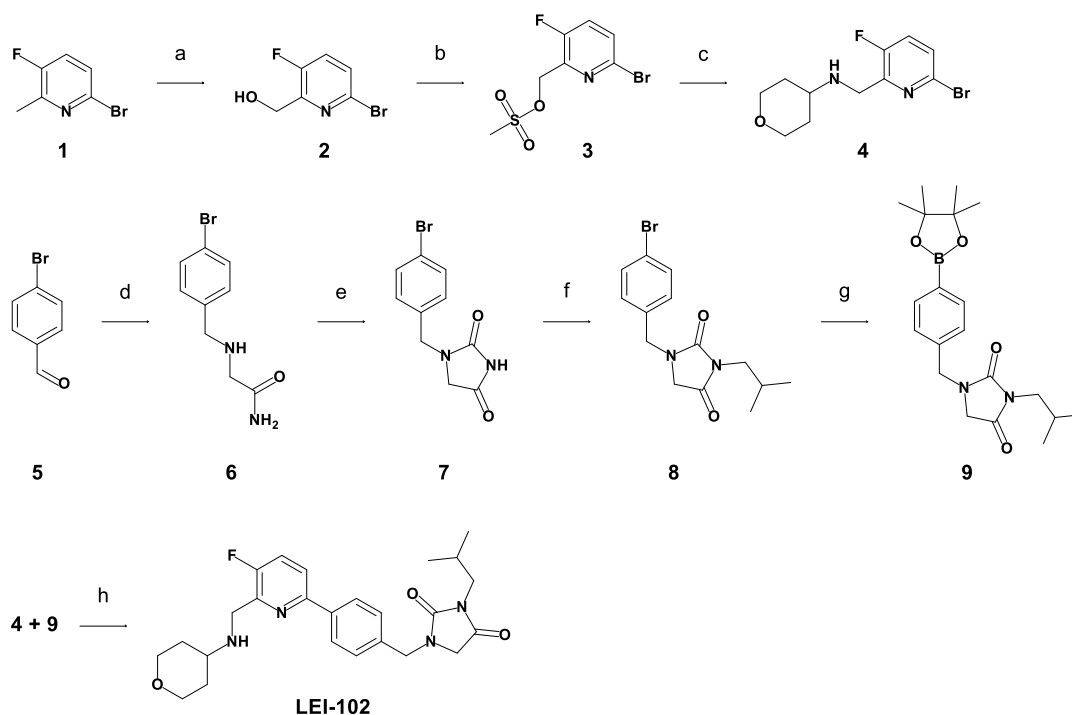

**Supplementary Fig. 1 | Synthetic route of LEI-102.** Reagents and conditions: a) step 1: *m*-CPBA (1.8 eq), 0 °C-rt, DCM, 4 days; step 2: TFAA (2.2 eq), 55 °C, 3 h; step 3: K<sub>2</sub>CO<sub>3</sub> (2.4 eq), THF:MeOH (20:1), 17 h, 35% (three steps); b) Et<sub>3</sub>N (2.3 eq), MsCl (1.7 eq), THF, 0 °C-rt, 1 h, 75%; c) K<sub>2</sub>CO<sub>3</sub> (2.2 eq), tetrahydro-2H-pyran-4-amine (1.3 eq), ACN, 50 °C, 3 h, 67%; d) step 1: 2-aminoacetamide hydrochloride (1.0 eq), NaOH (1.1 eq), MeOH:H<sub>2</sub>O (5:1), rt, 18 h; NaBH<sub>4</sub> (2.1 eq), 18 h, 91% (two steps); e) CDI (2.1 eq), DMAP (2.1 eq), ACN, 60 °C, 70 h, 37%; f) K<sub>2</sub>CO<sub>3</sub> (3.0 eq), 1-bromo-2-methylpropane (2.0 eq), DMF, rt, 20 h, 88%; g) KOAc (4.4 eq), bis(pinacolato)diboron (1.5 eq), Pd(dppf)Cl<sub>2</sub> (0.06 eq), DMF, 75 °C, 20 h; h) **4** (1.0 eq), **9** (1.5 eq), K<sub>2</sub>CO<sub>3</sub> (6.0 eq), Pd(PPh<sub>3</sub>)<sub>4</sub> (0.1 eq), toluene:EtOH (4:1), 75 °C, 18 h, 45% (two steps).

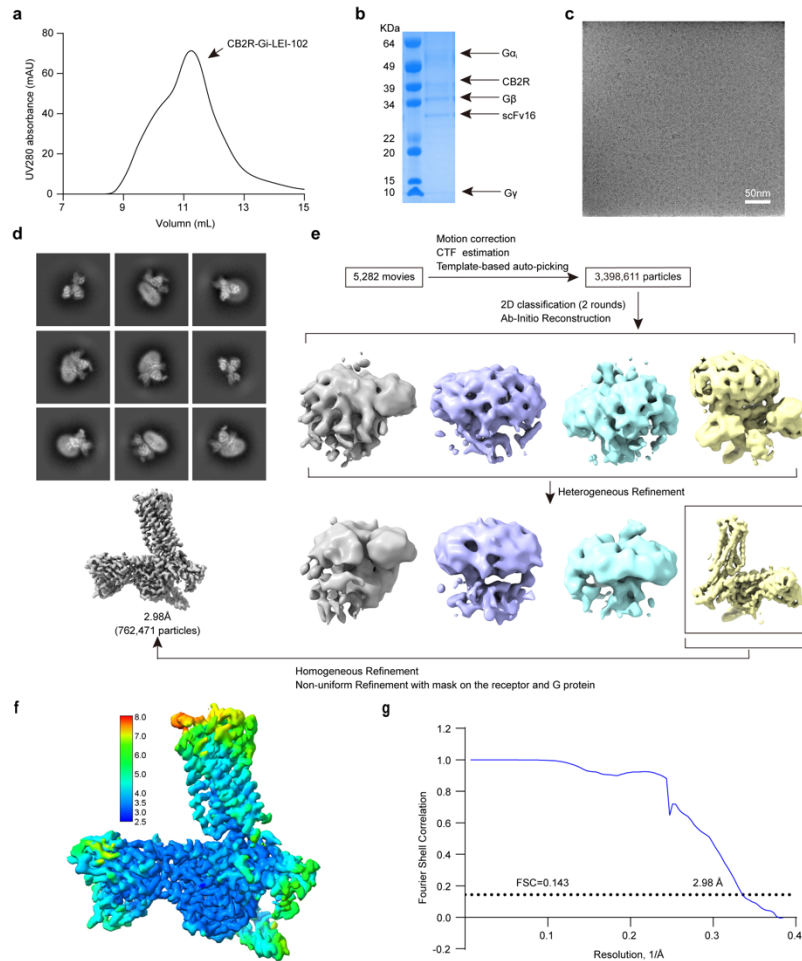

**Supplementary Fig. 2 | CB<sub>2</sub>R-G<sub>i</sub>-scfv16-LEI-102 complex preparation and cryo-EM data processing.** **(a)** Representative size-exclusion chromatography elution profile of CB<sub>2</sub>R complex. Fractions corresponding to the main peak of monomers are indicated. **(b)** Coomassie blue staining of the CB<sub>2</sub>R-G<sub>i</sub>-scFv16 complex. **(c)** Representative cryo-EM micrograph of the CB<sub>2</sub>R-G<sub>i</sub>-scFv16 complex. Scale bar: 50 nm. **(d)** Representative 2D averages (box size: 256 Å) showing diverse secondary structure features. **(e)** Flow chart of cryo-EM single particle analysis of the CB<sub>2</sub>R-G<sub>i</sub>-scFv16 complex. **(f)** Local resolution map of the CB<sub>2</sub>R-G<sub>i</sub>-scFv16 complex. **(g)** Fourier shell correlation curves of the CB<sub>2</sub>R-G<sub>i</sub>-scFv16 complex.

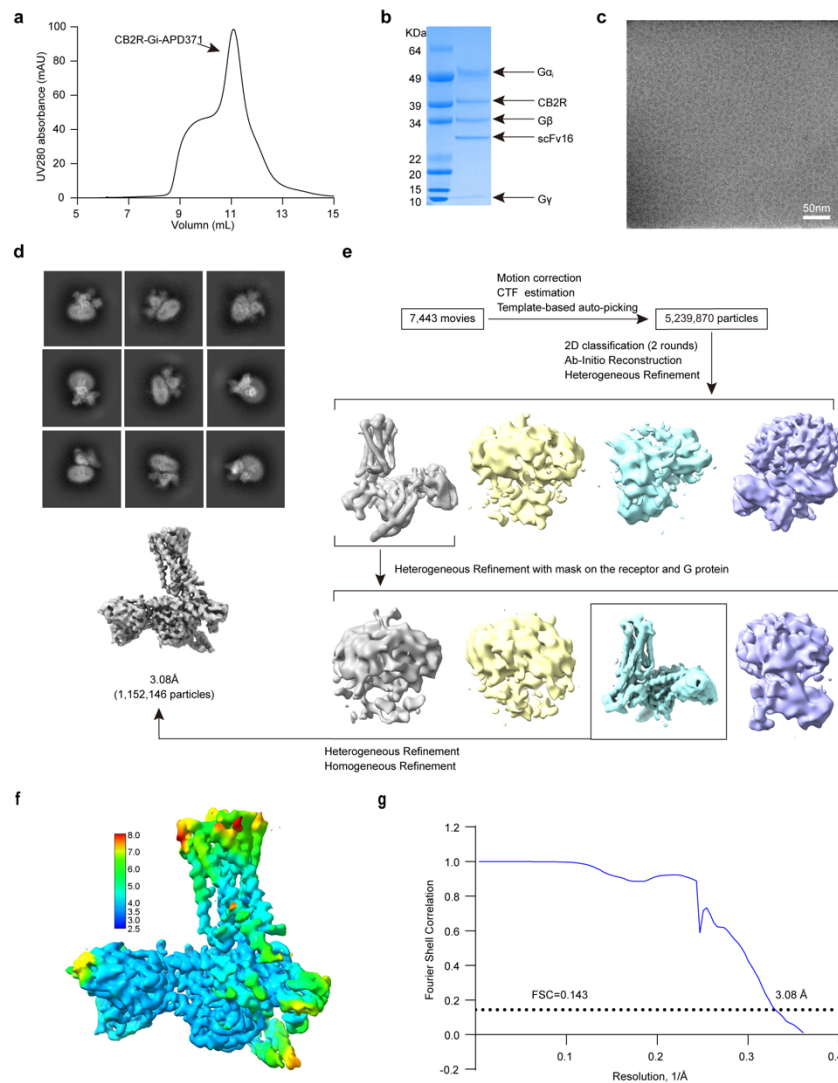

**Supplementary Fig. 3 | CB<sub>2</sub>R-G<sub>i</sub>-scFv16-APD371 complex preparation and cryo-EM data processing.** **(a)** Representative size-exclusion chromatography elution profile of CB<sub>2</sub>R complex. Fractions corresponding to the main peak of monomers are indicated. **(b)** Coomassie blue staining of the CB<sub>2</sub>R-G<sub>i</sub>-scFv16 complex. **(c)** Representative cryo-EM micrograph of the CB<sub>2</sub>R-G<sub>i</sub>-scFv16 complex. Scale bar: 50 nm. **(d)** Representative 2D averages (box size: 256 Å) showing diverse secondary structure features. **(e)** Flow chart of cryo-EM single particle analysis of the CB<sub>2</sub>R-G<sub>i</sub>-scFv16 complex. **(f)** Local resolution map of the CB<sub>2</sub>R-G<sub>i</sub>-scFv16 complex. **(g)** Fourier shell correlation curves of the CB<sub>2</sub>R-G<sub>i</sub>-scFv16 complex.

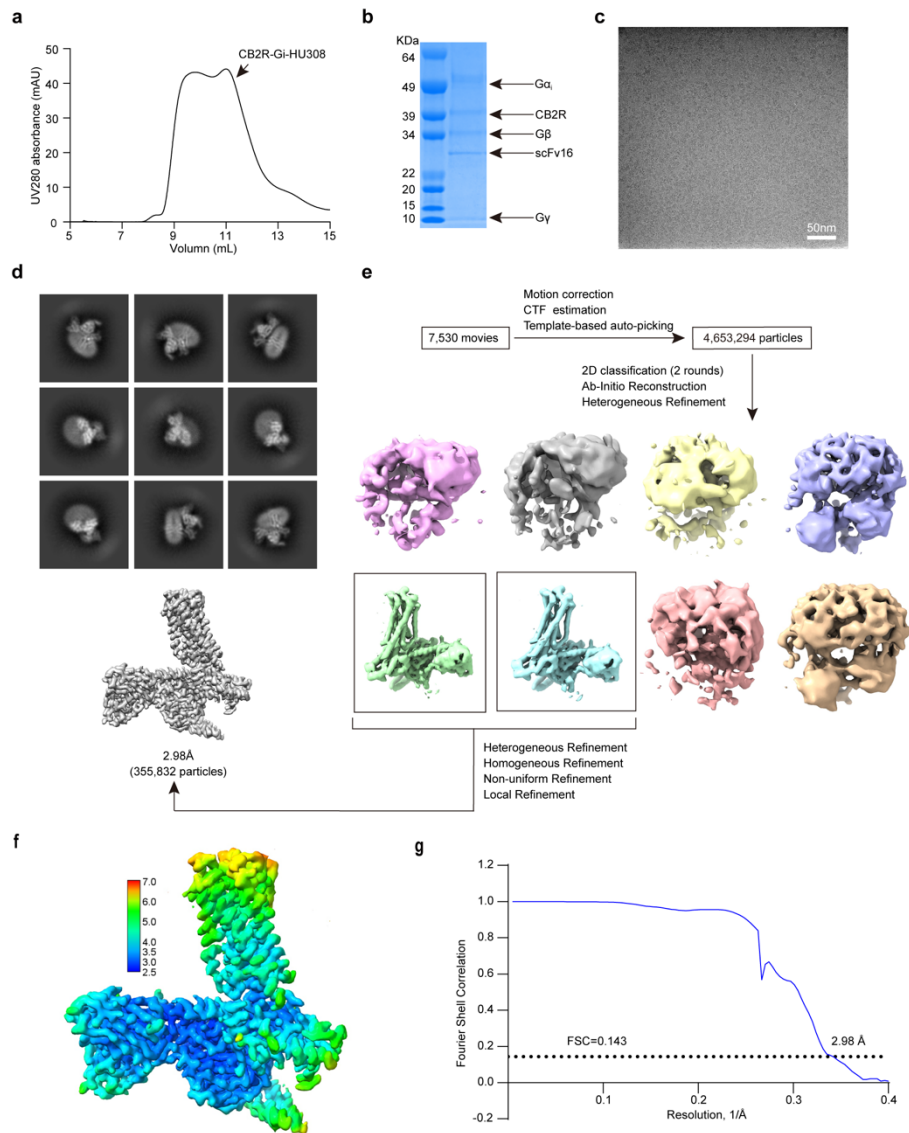

**Supplementary Fig. 4 | CB<sub>2</sub>R-G<sub>i</sub>-scFv16-HU308 complex preparation and cryo-EM data processing.** **(a)** Representative size-exclusion chromatography elution profile of CB<sub>2</sub>R complex. Fractions corresponding to the main peak of monomers are indicated. **(b)** Coomassie blue staining of the CB<sub>2</sub>R-G<sub>i</sub>-scFv16 complex. **(c)** Representative cryo-EM micrograph of the CB<sub>2</sub>R-G<sub>i</sub>-scFv16 complex. Scale bar: 50 nm. **(d)** Representative 2D averages (box size: 256 Å) showing diverse secondary structure features. **(e)** Flow chart of cryo-EM single particle analysis of the CB<sub>2</sub>R-G<sub>i</sub>-scFv16 complex. **(f)** Local resolution map of the CB<sub>2</sub>R-G<sub>i</sub>-scFv16 complex. **(g)** Fourier shell correlation curves of the CB<sub>2</sub>R-G<sub>i</sub>-scFv16 complex.

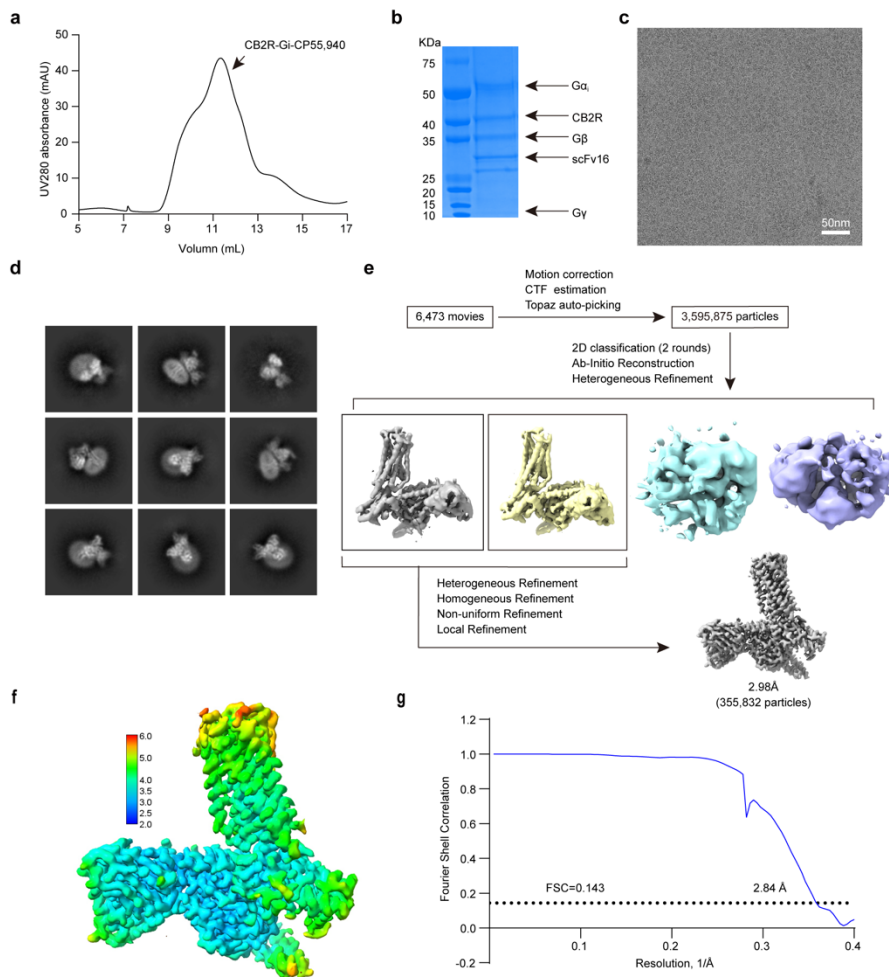

**Supplementary Fig. 5 | CB<sub>2</sub>R-G<sub>i</sub>-scFv16-CP55,940 complex preparation and cryo-EM data processing.** (a) Representative size-exclusion chromatography elution profile of CB<sub>2</sub>R complex. Fractions corresponding to the main peak of monomers are indicated. (b) Coomassie blue staining of the CB<sub>2</sub>R-G<sub>i</sub>-scFv16 complex. (c) Representative cryo-EM micrograph of the CB<sub>2</sub>R-G<sub>i</sub>-scFv16 complex. Scale bar: 50 nm. (d) Representative 2D averages (box size: 256 Å) showing diverse secondary structure features. (e) Flow chart of cryo-EM single particle analysis of the CB<sub>2</sub>R-G<sub>i</sub>-scFv16 complex. (f) Local resolution map of the CB<sub>2</sub>R-G<sub>i</sub>-scFv16 complex. (g) Fourier shell correlation curves of the CB<sub>2</sub>R-G<sub>i</sub>-scFv16 complex.

a

CB<sub>2</sub>R-Gi-LEI-102 complex

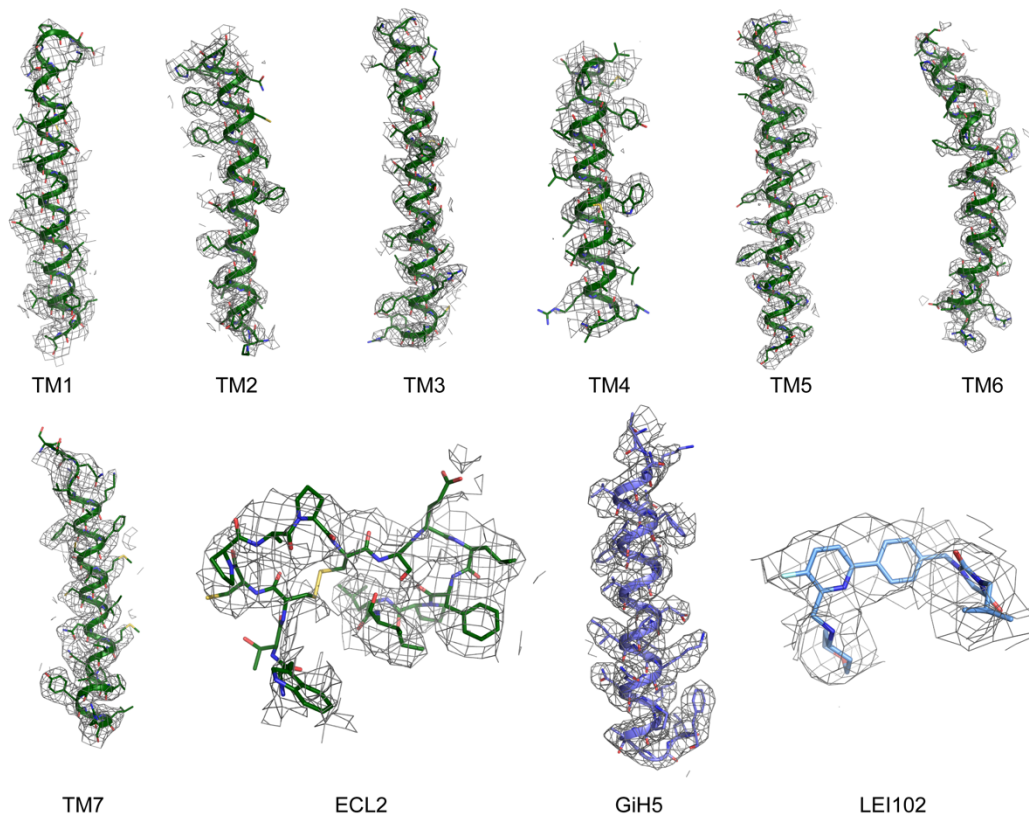

b

CB<sub>2</sub>R-Gi-APD371 complex

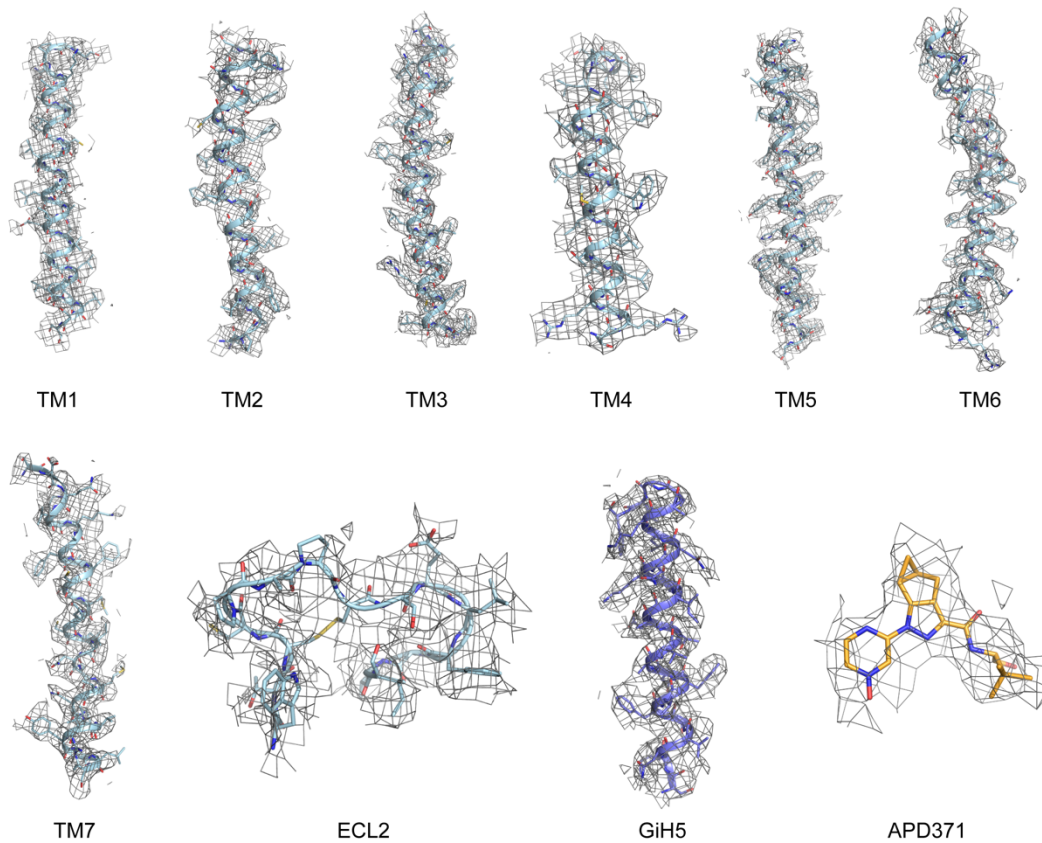

c

CB<sub>2</sub>R-Gi-HU308 complex

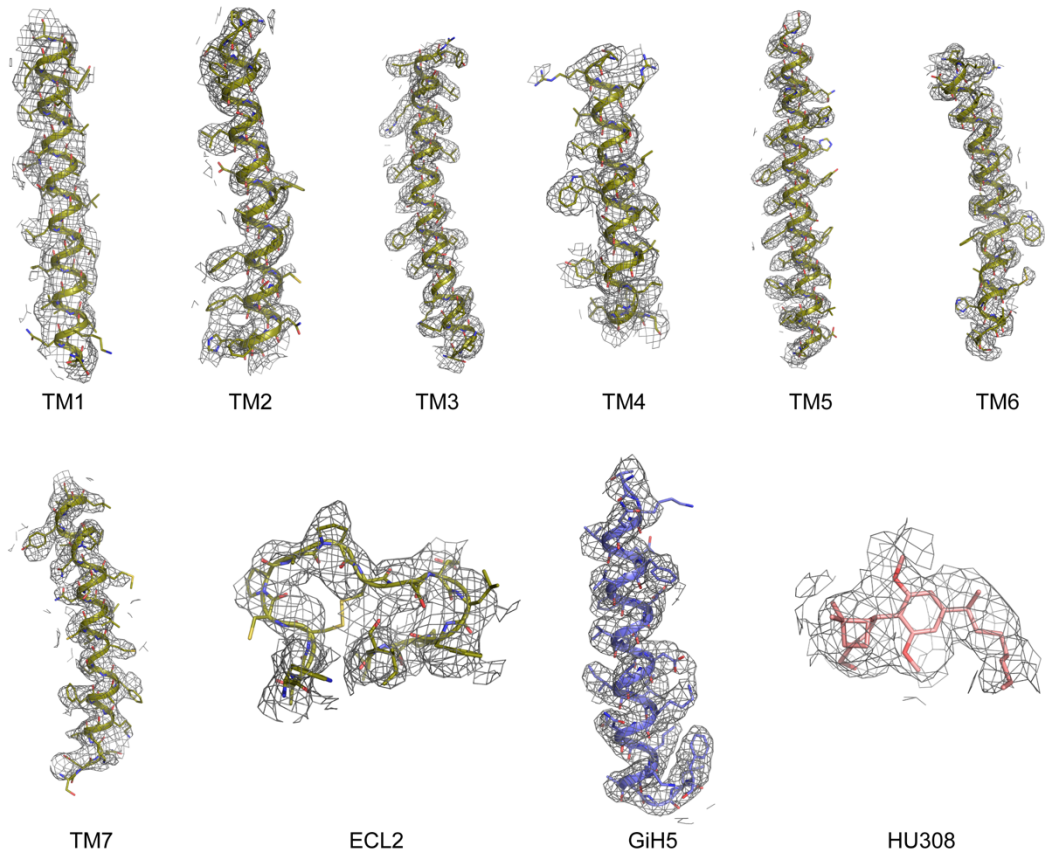

d

CB<sub>2</sub>R-Gi-CP55,940 complex

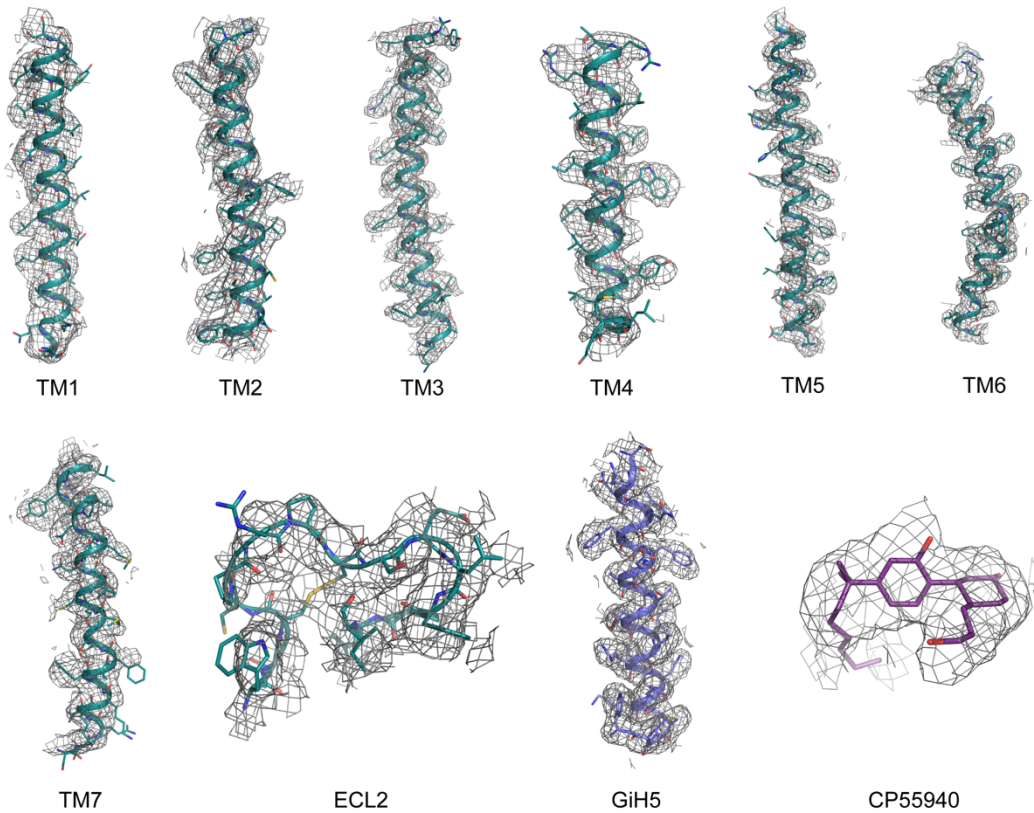



**Supplementary Fig. 6 | Representative cryo-EM density map of the CB<sub>2</sub>R-G<sub>i</sub>-scFv16 complex. (a-d)** EM density map and models are shown for all transmembrane helices, ECL2, ligand and  $\alpha 5$  helix of G $\alpha_i$  (G $\alpha_i$ H5) in **(a)** LEI-102, **(b)** APD371, **(c)** HU308 and **(d)** CP55,940 bound CB<sub>2</sub>R-G<sub>i</sub>-scFv16 complex.

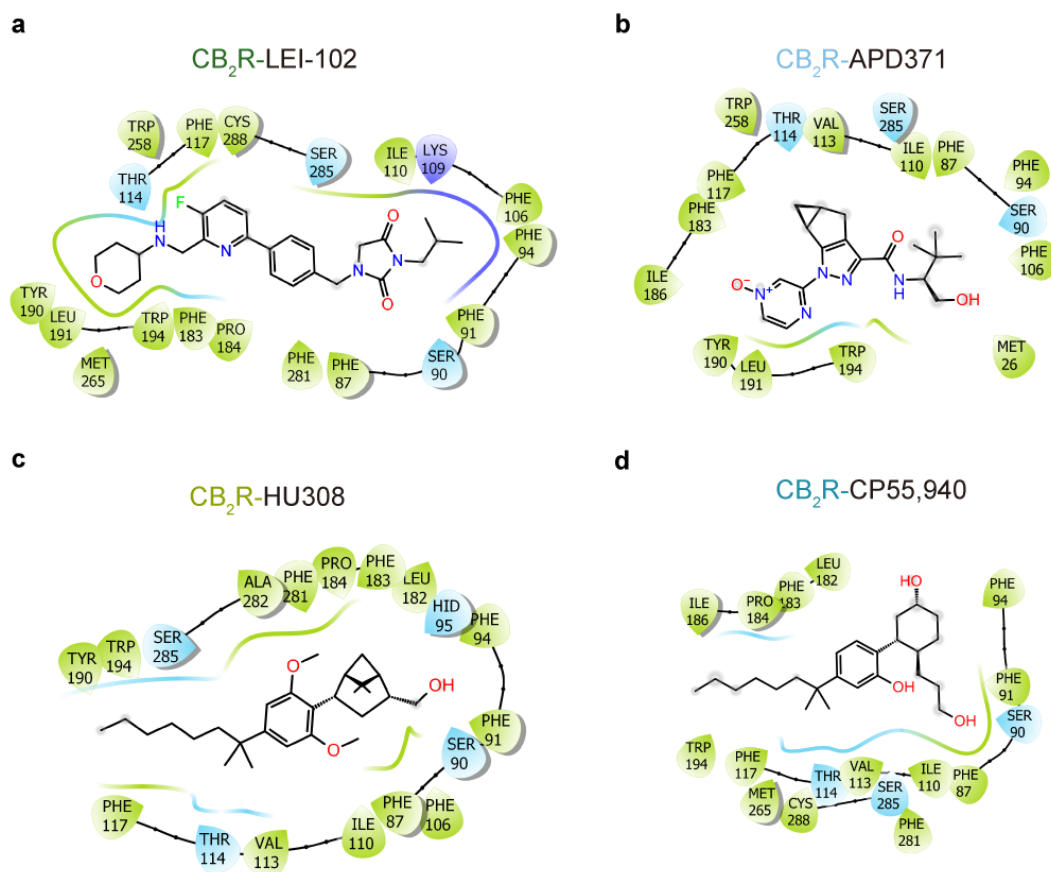

**Supplementary Fig. 7 | Schematic representation of interactions between  $CB_2R$  and Agonists.** (a-d) Schematic 2D representation of the binding pocket of agonist (a) LEI-102, (b) APD371, (c) HU308 and (d) CP55,940. Hydrophobic amino acids are colored in green, polar amino acids are colored in cyan, basic amino acids are colored in purple.

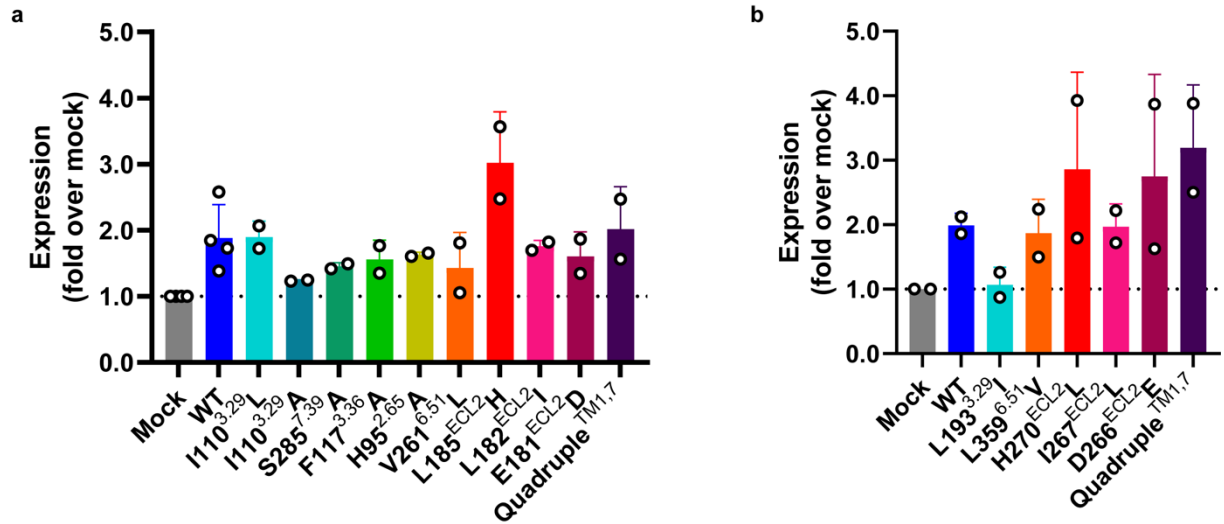

### Supplementary Fig. 8 | Cell surface receptor expression

Receptor expression as determined by ELISA for **(a)** CB<sub>2</sub>R and **(b)** CB<sub>1</sub>R wild type (WT) and mutants. Data are expressed as mean  $\pm$  SD of at least two experiments performed in quintuplicate (specific *n* values are given in Supplementary Table 5). Source data are provided as a Source Data file.

**Supplementary Table 1. Physico-chemical properties of the investigated ligands.** All values calculated using RDKit KNIME nodes version 4.5.0.v202207051536, apart from CLogP which was calculated using ChemDraw 19.0.

| <b>Compound</b> | <b>CLogP</b> | <b>SLogP</b> | <b>TPSA<br/>(Å)</b> | <b>MW<br/>(g/mol)</b> | <b>NumRotatableBonds</b> | <b>NumHBD</b> | <b>NumHBA</b> |
|-----------------|--------------|--------------|---------------------|-----------------------|--------------------------|---------------|---------------|
| $\Delta^9$ -THC | 7.24         | 5.74         | 29.5                | 314.5                 | 4                        | 1             | 2             |
| 2-AG            | 6.89         | 5.03         | 66.8                | 378.6                 | 17                       | 2             | 4             |
| AEA             | 6.18         | 5.24         | 49.3                | 347.5                 | 16                       | 2             | 2             |
| CP55,940        | 5.82         | 5.66         | 60.7                | 376.6                 | 10                       | 3             | 3             |
| HU308           | 8.00         | 6.63         | 38.7                | 414.6                 | 10                       | 1             | 3             |
| APD371          | -0.35        | 0.70         | 107.0               | 357.4                 | 4                        | 2             | 6             |
| LEI-102         | 2.07         | 3.58         | 74.8                | 454.5                 | 8                        | 1             | 5             |

**Supplementary Table 2. Functional activity, affinity and kinetic parameters of synthetic agonists and endocannabinoids on hCB<sub>2</sub>R**

| Compound | pEC <sub>50</sub> <sup>a</sup> | E <sub>max</sub> (%) <sup>b</sup> | <i>n</i> | pK <sub>i</sub><br>(K <sub>i</sub> , nM) <sup>c</sup> | <i>n</i> | <i>k</i> <sub>on</sub> (M <sup>-1</sup> s <sup>-1</sup> ) <sup>d</sup> | ET (s) <sup>e</sup> | <i>k</i> <sub>off</sub> (s <sup>-1</sup> ) <sup>f</sup> | RT<br>(min) <sup>g</sup> | K <sub>D</sub> (nM) <sup>h</sup> | <i>n</i> |
|----------|--------------------------------|-----------------------------------|----------|-------------------------------------------------------|----------|------------------------------------------------------------------------|---------------------|---------------------------------------------------------|--------------------------|----------------------------------|----------|
| LEI-102  | 6.9 ± 0.2                      | 76 ± 1                            | 3        | 8.0 ± 0.1<br>(9.7)                                    | 3        | (6.3 ± 1.1) × 10 <sup>4</sup>                                          | 16.0 ± 2.82         | (1.0 ± 0.2)<br>× 10 <sup>-3</sup>                       | 16 ± 3.3                 | 16.5                             | 3        |
| APD371   | 7.9 ± 0.1                      | 134 ± 12                          | 3        | 7.5 ± 0.1<br>(35.3)                                   | 3        | (2.5 ± 0.4) × 10 <sup>4</sup>                                          | 40.1 ± 5.90         | (3.7 ± 0.5)<br>× 10 <sup>-4</sup>                       | 45 ± 6.6                 | 14.9                             | 3        |
| HU308    | 7.1 ± 0.2                      | 91 ± 8                            | 3        | 7.0 ± 0.1<br>(92.4)                                   | 3        | (7.0 ± 2.3) × 10 <sup>3</sup>                                          | 143 ± 47.9          | (2.3 ± 0.4)<br>× 10 <sup>-4</sup>                       | 71 ± 11                  | 33.7                             | 3        |
| CP55,940 | 8.5 ± 0.3                      | 98 ± 4                            | 6        | 8.9 ± 0.1<br>(1.4)                                    | 3        | (1.8 ± 0.4) × 10 <sup>6</sup>                                          | 0.57 ± 0.13         | (5.2 ± 0.9)<br>× 10 <sup>-4</sup>                       | 32 ± 5.5                 | 0.3                              | 3        |
| AEA      | 6.3 ± 0.2                      | 60 ± 5                            | 3        | 6.3 ± 0.1<br>(484.5)                                  | 3        | (6.6 ± 0.5) × 10 <sup>3</sup>                                          | 152 ± 10.4          | (2.4 ± 0.1)<br>× 10 <sup>-3</sup>                       | 6.8 ± 0.4                | 371.7                            | 3        |
| 2-AG     | 5.9 ± 0.1                      | 93 ± 22                           | 3        | 7.0 ± 0.1<br>(97.3)                                   | 3        | (5.3 ± 1.0) × 10 <sup>4</sup>                                          | 18.8 ± 3.61         | (2.3 ± 0.3)<br>× 10 <sup>-3</sup>                       | 7.4 ± 1.0                | 42.7                             | 3        |

<sup>a, b</sup> Potency (pEC<sub>50</sub>) and efficacy (E<sub>max</sub>) values were obtained from [<sup>35</sup>S]GTPγS assays on HEK293T membranes transiently expressing CB<sub>2</sub>R WT. The percentage maximum effect (E<sub>max</sub> in %) was calculated compared to CP55,940. <sup>c, d, f</sup> Binding affinities (pK<sub>i</sub>), association (*k*<sub>on</sub>) and dissociation (*k*<sub>off</sub>) rate constants were determined in [<sup>3</sup>H]RO6957022 binding assays on CHOK1\_hCB<sub>2</sub>bgal membranes at 10 °C. <sup>e</sup> Engagement time (ET) of the compound to the receptor at 1 μM agonist was determined by  $ET = 1/(k_{on} \cdot 1 \times 10^{-6})$  and is expressed in seconds (s), whereas *k*<sub>on</sub> is expressed in M<sup>-1</sup>s<sup>-1</sup>. <sup>g</sup> Residence time (RT) was determined by  $RT = 1/(60 \cdot k_{off})$  and is expressed in min, whereas *k*<sub>off</sub> is expressed in s<sup>-1</sup>. <sup>h</sup> Kinetic K<sub>D</sub> values, defined by  $K_D = k_{off}/k_{on}$ . Values represent the mean ± SEM of at least three independent experiments performed in duplicate (*n* indicates the number of biological replicates). Source data are provided as a Source Data file.

**Supplementary Table 3. Characterization of cannabinoid CB<sub>1</sub> receptor mutations in [<sup>3</sup>H]CP55,940 displacement assays**

|                |                            |                                          | LEI-102                       | APD371               | HU308                | CP55,940                     | AEA                    | 2-AG                  |          |
|----------------|----------------------------|------------------------------------------|-------------------------------|----------------------|----------------------|------------------------------|------------------------|-----------------------|----------|
|                |                            | pK <sub>D</sub><br>(K <sub>D</sub> , nM) | Displacement (%) <sup>a</sup> |                      |                      | pK <sub>i</sub> <sup>b</sup> |                        |                       | <i>n</i> |
|                | WT                         | 8.3 ± 0.1 (5.24)                         | 17 ± 7                        | -19 ± 17             | 6 ± 7                | 8.3 ± 0.1                    | 6.3 ± 0.1              | 5.6 ± 0.2             | 3        |
| Binding pocket | L193 <sup>3,29</sup> I     | n.d.                                     | n.d.                          | n.d.                 | n.d.                 | n.d.                         | n.d.                   | n.d.                  | 3        |
|                | L359 <sup>6,51</sup> V     | 8.6 ± 0.2 (2.80)                         | 25 ± 6<br>[0.8796]            | 18 ± 9<br>[0.4248]   | 41 ± 10<br>[0.6809]  | 8.5 ± 0.1<br>[0.3912]        | 6.3 ± 0.1<br>[>0.9999] | 5.9 ± 0.1<br>[0.4246] | 3        |
| Ligand entry   | H270 <sup>ECL2</sup> L     | 8.4 ± 0.2 (3.70)                         | 47 ± 5<br>[0.0839]            | 8 ± 3<br>[0.6025]    | 46 ± 3<br>[0.8951]   | 8.4 ± 0.1<br>[0.7882]        | 6.3 ± 0.0<br>[0.9992]  | 5.5 ± 0.2<br>[0.9992] | 3        |
|                | I267 <sup>ECL2</sup> L     | 8.6 ± 0.1 (2.57)                         | 25 ± 3<br>[0.7745]            | -24 ± 17<br>[0.9998] | -7 ± 19<br>[0.2577]  | 8.6 ± 0.1<br>[0.0802]        | 6.4 ± 0.1<br>[0.9895]  | 6.1 ± 0.2<br>[0.3849] | 3        |
|                | D266 <sup>ECL2</sup> E     | 8.7 ± 0.2 (1.91)                         | 38 ± 10<br>[0.4418]           | 12 ± 7<br>[0.5227]   | 34 ± 5<br>[0.3445]   | 8.7 ± 0.1<br>[0.1266]        | 6.7 ± 0.1<br>[0.3000]  | 5.9 ± 0.1<br>[0.4302] | 3        |
|                | Quadruple <sup>TM1,7</sup> | 8.1 ± 0.2 (8.36)                         | 26 ± 10<br>[0.9110]           | 0 ± 25<br>[0.9689]   | -13 ± 22<br>[0.8718] | 8.1 ± 0.2<br>[0.7771]        | 6.4 ± 0.0<br>[0.9796]  | 5.3 ± 0.0<br>[0.6300] | 3        |

Mutations are shown in the numbering of the cannabinoid CB<sub>1</sub> receptor (CB<sub>1</sub>R) amino acid sequence, as well as the Ballesteros and Weinstein GPCR numbering system. <sup>a,b</sup>Percentage of [<sup>3</sup>H]CP55,940 displacement by 10 μM compound or binding affinity (pK<sub>i</sub>) were determined in [<sup>3</sup>H]CP55,940 displacement assays on HEK293T membranes transiently expressing CB<sub>1</sub>R constructs. All values are presented as the mean ± SEM of at least three independent experiments performed in duplicate (*n* indicates the number of biological replicates). One-way Welch ANOVA with Dunnett's T3 posthoc test was used to analyze differences in pK<sub>D</sub> or pK<sub>i</sub> values compared to WT. Exact p values are given between square brackets. n.d. is not determined. Source data are provided as a Source Data file.

**Supplementary Table 4. Cryo-EM data collection, model refinement, and validation statistics.**

|                                                     | CB <sub>2</sub> R-<br>HU308-G <sub>i</sub> | CB <sub>2</sub> R-LEI-<br>102-G <sub>i</sub> | CB <sub>2</sub> R-<br>APD371-G <sub>i</sub> | CB <sub>2</sub> R-<br>CP55,940-G <sub>i</sub> |
|-----------------------------------------------------|--------------------------------------------|----------------------------------------------|---------------------------------------------|-----------------------------------------------|
| <b>Data collection and processing</b>               |                                            |                                              |                                             |                                               |
| Magnification                                       | 105,000                                    | 105,000                                      | 105,000                                     | 105,000                                       |
| Voltage (kV)                                        | 300                                        | 300                                          | 300                                         | 300                                           |
| Electron exposure (e <sup>-</sup> /Å <sup>2</sup> ) | 60                                         | 60                                           | 60                                          | 60                                            |
| Defocus range (μm)                                  | -1.0~-2.0                                  | -1.0~-2.0                                    | -1.0~-2.0                                   | -1.0~-2.0                                     |
| Pixel size (Å)                                      | 0.52                                       | 0.52                                         | 0.52                                        | 0.52                                          |
| Symmetry imposed                                    | C1                                         | C1                                           | C1                                          | C1                                            |
| Images (no.)                                        | 7,530                                      | 5,282                                        | 7,443                                       | 6,473                                         |
| Initial particle images (no.)                       | 4,653,294                                  | 3,398,611                                    | 5,239,870                                   | 3,595,875                                     |
| Final particle images (no.)                         | 355,832                                    | 762,471                                      | 1,152,146                                   | 440,292                                       |
| Map resolution (Å)                                  | 2.97                                       | 2.98                                         | 3.08                                        | 2.84                                          |
| FSC threshold                                       | 0.143                                      | 0.143                                        | 0.143                                       | 0.143                                         |
| Map resolution range (Å)                            | 2.9~6.0                                    | 2.9~6.0                                      | 2.9~6.0                                     | 2.7~5.0                                       |
| <b>Refinement</b>                                   |                                            |                                              |                                             |                                               |
| Initial model used (PDB code)                       | 6KPF                                       | 6KPF                                         | 6KPF                                        | 6KPF                                          |
| Map sharpening <i>B</i> factor (Å <sup>2</sup> )    | 110.8                                      | -104.2                                       | -118.6                                      | -100.9                                        |
| Model composition                                   |                                            |                                              |                                             |                                               |
| Non-hydrogen atoms                                  | 8,817                                      | 8,812                                        | 8,801                                       | 8,888                                         |
| Protein residues                                    | 1,137                                      | 1,137                                        | 1,137                                       | 1,139                                         |
| Ligands                                             | 1                                          | 1                                            | 1                                           | 1                                             |
| <i>B</i> factors (Å <sup>2</sup> )                  |                                            |                                              |                                             |                                               |
| Protein                                             | 68.91                                      | 68.00                                        | 61.04                                       | 68.22                                         |
| Ligand                                              | 67.91                                      | 76.90                                        | 104.87                                      | 85.48                                         |
| R.m.s. deviations                                   |                                            |                                              |                                             |                                               |
| Bond lengths (Å)                                    | 0006                                       | 0.003                                        | 0.009                                       | 0.010                                         |
| Bond angles (°)                                     | 0.69                                       | 0.57                                         | 1.24                                        | 1.80                                          |
| Validation                                          |                                            |                                              |                                             |                                               |
| MolProbity score                                    | 1.83                                       | 1.82                                         | 1.64                                        | 1.46                                          |
| Clashscore                                          | 12.11                                      | 12.29                                        | 5.04                                        | 7.74                                          |
| Poor rotamers (%)                                   | 0.00                                       | 0.00                                         | 0.32                                        | 0.00                                          |
| Ramachandran plot                                   |                                            |                                              |                                             |                                               |
| Favored (%)                                         | 96.43                                      | 96.60                                        | 94.46                                       | 97.86                                         |
| Allowed (%)                                         | 3.57                                       | 3.40                                         | 5.54                                        | 2.14                                          |
| Disallowed (%)                                      | 0.00                                       | 0.00                                         | 0.00                                        | 0.00                                          |

**Supplementary Table 5. Cell surface expression levels of cannabinoid receptor constructs in ELISA.**

|                       | <b>CB<sub>2</sub>R</b>           | <b>Expression<br/>(fold over mock)</b> | <b><i>n</i></b> | <b>CB<sub>1</sub>R</b>           | <b>Expression<br/>(fold over mock)</b> | <b><i>n</i></b> |
|-----------------------|----------------------------------|----------------------------------------|-----------------|----------------------------------|----------------------------------------|-----------------|
|                       | <b>WT</b>                        | 1.9 ± 0.5                              | 4               | <b>WT</b>                        | 2.0 ± 0.2                              | 2               |
| <b>Binding pocket</b> | <b>I110<sup>3.29</sup>L</b>      | 1.9 ± 0.2                              | 2               | <b>L193<sup>3.29</sup>I</b>      | 1.1 ± 0.3                              | 2               |
|                       | <b>I110<sup>3.29</sup>A</b>      | 1.2 ± 0.0                              | 2               | <b>L193<sup>3.29</sup>A</b>      | n.d                                    | 2               |
|                       | <b>S285<sup>7.39</sup>A</b>      | 1.5 ± 0.1                              | 2               | <b>S383<sup>7.39</sup>A</b>      | n.d                                    | 2               |
|                       | <b>F117<sup>3.36</sup>A</b>      | 1.6 ± 0.3                              | 2               | <b>F200<sup>3.36</sup>A</b>      | n.d                                    | 2               |
|                       | <b>H95<sup>2.65</sup>A</b>       | 1.6 ± 0.0                              | 2               | <b>H178<sup>2.65</sup>A</b>      | n.d                                    | 2               |
|                       | <b>V261<sup>6.51</sup>L</b>      | 1.4 ± 0.5                              | 2               | <b>L359<sup>6.51</sup>V</b>      | 1.9 ± 0.5                              | 2               |
| <b>Ligand entry</b>   | <b>L185<sup>ECL2</sup>H</b>      | 3.0 ± 0.8                              | 2               | <b>H270<sup>ECL2</sup>L</b>      | 2.9 ± 1.5                              | 2               |
|                       | <b>L182<sup>ECL2</sup>I</b>      | 1.8 ± 0.1                              | 2               | <b>I267<sup>ECL2</sup>L</b>      | 2.0 ± 0.4                              | 2               |
|                       | <b>E181<sup>ECL2</sup>D</b>      | 1.6 ± 0.4                              | 2               | <b>D266<sup>ECL2</sup>E</b>      | 2.7 ± 1.6                              | 2               |
|                       | <b>Quadruple<sup>TM1,7</sup></b> | 2.0 ± 0.6                              | 2               | <b>Quadruple<sup>TM1,7</sup></b> | 3.2 ± 1.0                              | 2               |

Mutations are shown in the numbering of the cannabinoid CB<sub>2</sub> (CB<sub>2</sub>R) or CB<sub>1</sub> receptor (CB<sub>1</sub>R) amino acid sequence as well as the Ballesteros and Weinstein GPCR numbering system. Data are presented as fold over mock (empty pcDNA3.1 vector) and are mean ± SD of at least two individual experiments performed in quintuplicate (*n* indicates the number of biological replicates). n.d. is not determined. Source data are provided as a Source Data file.



**Supplementary Table 6. Characterization of cannabinoid CB<sub>2</sub> receptor mutations in G protein activation assays.**

|                |                        |                            |          | LEI-102                        |                                   |          | APD371                  |                         |          | HU308                    |                         |          | CP55,940                |                         |          | AEA                   |                      |          | 2-AG                      |                      |          |
|----------------|------------------------|----------------------------|----------|--------------------------------|-----------------------------------|----------|-------------------------|-------------------------|----------|--------------------------|-------------------------|----------|-------------------------|-------------------------|----------|-----------------------|----------------------|----------|---------------------------|----------------------|----------|
|                | Construct              | Basal <sup>a</sup>         | <i>n</i> | pEC <sub>50</sub> <sup>b</sup> | E <sub>max</sub> (%) <sup>c</sup> | <i>n</i> | pEC <sub>50</sub>       | E <sub>max</sub> (%)    | <i>n</i> | pEC <sub>50</sub>        | E <sub>max</sub> (%)    | <i>n</i> | pEC <sub>50</sub>       | E <sub>max</sub> (%)    | <i>n</i> | pEC <sub>50</sub>     | E <sub>max</sub> (%) | <i>n</i> | pEC <sub>50</sub>         | E <sub>max</sub> (%) | <i>n</i> |
|                | WT                     | 1.0 ± 0.0                  | 9        | 6.9 ± 0.2                      | 103 ± 3                           | 10       | 7.9 ± 0.1               | 109 ± 3                 | 10       | 7.1 ± 0.2                | 105 ± 3                 | 10       | 8.5 ± 0.3               | 99 ± 3                  | 9        | 6.3 ± 0.2             | 106 ± 7              | 3        | 5.9 ± 0.1                 | 85 ± 2               | 3        |
| Binding pocket | I110 <sup>3,29</sup> L | 1.0 ± 0.0<br>[0.5080]      | 3        | 7.8 ± 0.1**<br>[0.0056]        | 91 ± 3<br>[0.3262]                | 3        | 6.7 ± 0.3<br>[0.1190]   | 101 ± 7<br>[0.9253]     | 3        | 6.7 ± 0.4<br>[0.8664]    | 122 ± 12<br>[0.8030]    | 3        | 9.4 ± 0.2<br>[0.0625]   | 96 ± 3<br>[0.9938]      | 3        | n.d.                  | n.d.                 | 3        | n.d.                      | n.d.                 | 3        |
|                | I110 <sup>3,29</sup> A | 1.0 ± 0.1<br>[>0.9999<br>] | 3        | 7.0 ± 0.6<br>[>0.9999]         | 36 ± 13<br>[0.1391]               | 3        | 6.6 ± 0.6<br>[0.4641]   | 28 ± 9**<br>[0.0052]    | 4        | 6.4 ± 0.5<br>[0.7656]    | 27 ± 10**<br>[0.0094]   | 4        | 8.7 ± 0.4<br>[0.9975]   | 30 ± 2****<br>[<0.0001] | 3        | n.d.                  | n.d.                 | 3        | n.d.                      | n.d.                 | 3        |
|                | S285 <sup>7,39</sup> A | 0.9 ± 0.0<br>[0.1553]      | 3        | 6.3 ± 0.3<br>[0.5159]          | 45 ± 8*<br>[0.0358]               | 3        | 6.5 ± 0.3<br>[0.1034]   | 49 ± 6*<br>[0.0139]     | 3        | 5.9 ± 0.1***<br>[0.0002] | 65 ± 18<br>[0.5179]     | 3        | 6.7 ± 0.1**<br>[0.0010] | 25 ± 5**<br>[0.0020]    | 3        | n.d.                  | n.d.                 | 3        | n.d.                      | n.d.                 | 3        |
|                | F117 <sup>3,36</sup> A | 0.8 ± 0.1<br>[0.4725]      | 3        | n.d.                           | 11 ± 11<br>[0.0578]               | 3        | n.d.                    | 2 ± 6**<br>[0.0028]     | 3        | n.d.                     | 5 ± 11*<br>[0.0475]     | 3        | n.d.                    | -1 ± 14<br>[0.0755]     | 3        | n.d.                  | n.d.                 | 3        | n.d.                      | n.d.                 | 3        |
|                | H95 <sup>2,65</sup> A  | 0.9 ± 0.0<br>[0.3113]      | 3        | <5                             | 64 ± 7<br>[0.0630]                | 3        | 5.7 ± 0.2**<br>[0.0043] | 50 ± 1****<br>[<0.0001] | 3        | 6.6 ± 0.6<br>[0.9210]    | 67 ± 16<br>[0.4831]     | 3        | 6.9 ± 0.2**<br>[0.0029] | 68 ± 11<br>[0.3525]     | 3        | n.d.                  | n.d.                 | 3        | n.d.                      | n.d.                 | 3        |
|                | V261 <sup>6,51</sup> L | 0.8 ± 0.0<br>[0.1710]      | 3        | 6.4 ± 0.0<br>[0.6680]          | 8 ± 4****<br>[<0.0001]            | 3        | 6.9 ± 0.2*<br>[0.0364]  | 6 ± 2****<br>[<0.0001]  | 3        | <5                       | 26 ± 7**<br>[0.0086]    | 3        | <5                      | 12 ± 7**<br>[0.0085]    | 3        | n.d.                  | n.d.                 | 3        | n.d.                      | n.d.                 | 3        |
| Ligand entry   | L185 <sup>ECL2</sup> H | 1.2 ± 0.1<br>[0.2049]      | 6        | 6.9 ± 0.1<br>[>0.9999]         | 217 ± 21<br>[0.1210]              | 3        | 8.0 ± 0.1<br>[0.9490]   | 183 ± 16<br>[0.1714]    | 3        | 6.8 ± 0.2<br>[0.6863]    | 146 ± 8<br>[0.0741]     | 3        | 8.9 ± 0.4<br>[0.9552]   | 142 ± 16<br>[0.3320]    | 4        | 6.6 ± 0.0<br>[0.2269] | 210 ± 61<br>[0.5043] | 3        | 5.9 ± 0.2<br>[0.983<br>5] | 171 ± 16<br>[0.0852] | 3        |
|                | L182 <sup>ECL2</sup> I | 0.8 ± 0.0*<br>[0.0180]     | 6        | 7.4 ± 0.8<br>[0.9926]          | 11 ± 8*<br>[0.0106]               | 3        | 6.6 ± 0.4<br>[0.3556]   | 17 ± 4****<br>[0.0002]  | 3        | <5                       | 10 ± 7**<br>[0.0059]    | 3        | 8.8 ± 0.8<br>[0.9995]   | 19 ± 2****<br>[<0.0001] | 3        | <5                    | 5 ± 17*<br>[0.0329]  | 3        | <5                        | 15 ± 9*<br>[0.0433]  | 3        |
|                | E181 <sup>ECL2</sup> D | 0.9 ± 0.0<br>[0.6017]      | 6        | 6.9 ± 0.6<br>[>0.9999]         | 28 ± 13<br>[0.1146]               | 3        | 6.9 ± 0.6<br>[0.6868]   | 39 ± 6**<br>[0.0096]    | 3        | 7.0 ± 0.7<br>[0.9998]    | 32 ± 3****<br>[<0.0001] | 3        | 7.9 ± 0.5<br>[0.8972]   | 19 ± 10<br>[0.0669]     | 3        | <5                    | 14 ± 5**<br>[0.0012] | 3        | <5                        | 22 ± 15<br>[0.1357]  | 3        |

|  |                               |           |   |           |          |   |           |          |   |       |          |   |           |          |   |    |          |   |    |          |   |
|--|-------------------------------|-----------|---|-----------|----------|---|-----------|----------|---|-------|----------|---|-----------|----------|---|----|----------|---|----|----------|---|
|  | <b>Quadruple<sup>TM</sup></b> | 0.9 ± 0.0 | 3 | 6.2 ± 0.2 | 27 ± 5** | 3 | 8.4 ± 0.1 | 35 ± 7*  | 3 | n.d.# | 1 ± 9*   | 3 | 8.1 ± 0.2 | 18 ± 14  | 3 | <5 | 24 ± 7** | 3 | <5 | 6 ± 4*** | 3 |
|  | <sup>1,7</sup>                | [0.2061]  |   | [0.2672]  | [0.0012] |   | [0.2470]  | [0.0117] |   |       | [0.0323] |   | [0.8571]  | [0.1110] |   |    | [0.0036] |   |    | [0.0010] |   |

Mutations are shown in the numbering of the cannabinoid CB<sub>2</sub> receptor (CB<sub>2</sub>R) amino acid sequence as well as the Ballesteros and Weinstein GPCR numbering system. <sup>a,b,c</sup> Basal activity, potency (pEC<sub>50</sub>) and efficacy (E<sub>max</sub>) values were obtained from [<sup>35</sup>S]GTPγS assays on HEK293T membranes transiently expressing CB<sub>2</sub>R constructs. The percentage maximum effect at 10 μM (E<sub>max</sub> in %) and the fold basal activity values were calculated compared to WT. pEC<sub>50</sub> <5 was reported when the curve fit was not finished. Binding pocket mutations were not assessed for endocannabinoids. Values are presented as the mean ± SEM of at least three independent experiments performed in duplicate (*n* indicates the number of biological replicates). One-way Welch ANOVA with Dunnett's T3 posthoc test or Welch's t-test was used to analyze differences in pEC<sub>50</sub> and E<sub>max</sub> values compared to WT (\*p < 0.05, \*\* p < 0.01, \*\*\* p < 0.001, \*\*\*\* p < 0.00001). Exact p values are given between square brackets. n.d. is not determined. Source data are provided as a Source Data file.

**Supplementary Table 7. Characterization of cannabinoid CB<sub>2</sub> receptor mutations in [<sup>3</sup>H]CP55,940 displacement assays.**

|                |                                       |                                                       |          | LEI-102                      |          | APD371                       |          | HU308                        |          | CP55,940                     |          | AEA                          |          | 2-AG                         |          |
|----------------|---------------------------------------|-------------------------------------------------------|----------|------------------------------|----------|------------------------------|----------|------------------------------|----------|------------------------------|----------|------------------------------|----------|------------------------------|----------|
|                |                                       | pK <sub>D</sub><br>(K <sub>D</sub> , nM) <sup>a</sup> | <i>n</i> | pK <sub>i</sub> <sup>b</sup> | <i>n</i> | pK <sub>i</sub> <sup>b</sup> | <i>n</i> | pK <sub>i</sub> <sup>b</sup> | <i>n</i> | pK <sub>i</sub> <sup>b</sup> | <i>n</i> | pK <sub>i</sub> <sup>b</sup> | <i>n</i> | pK <sub>i</sub> <sup>b</sup> | <i>n</i> |
|                | <b>WT</b>                             | 9.1 ± 0.0<br>(0.77)                                   | 3        | 7.5 ± 0.1                    | 3        | 8.0 ± 0.0                    | 3        | 7.8 ± 0.2                    | 3        | 9.2 ± 0.2                    | 3        | 6.2 ± 0.1                    | 3        | 5.8 ± 0.1                    | 3        |
| Binding pocket | <b>I110<sup>3,29</sup></b>            | 9.2 ± 0.2<br>(0.66)                                   | 4        | 7.9 ± 0.0                    | 3        | 7.1 ± 0.0                    | 3        | 7.3 ± 0.1                    | 3        | 9.1 ± 0.1                    | 3        | 6.1 ± 0.1                    | 3        | 5.8 ± 0.1                    | 3        |
|                | <b>L</b>                              |                                                       |          | [0.0674]                     |          | 0.0***<br>[0.0008]           |          | [0.2954]                     |          | [0.9959]                     |          | [0.7643]                     |          | [0.9226]                     |          |
| Ligand entry   | <b>L185<sup>ECL</sup></b>             | 9.2 ± 0.1<br>(0.60)                                   | 3        | 7.3 ± 0.1                    | 3        | 7.7 ± 0.1                    | 3        | 7.2 ± 0.0                    | 3        | 9.4 ± 0.1                    | 3        | 6.3 ± 0.1                    | 3        | 6.4 ± 0.2                    | 3        |
|                | <b><sup>2</sup>H</b>                  |                                                       |          | [0.6573]                     |          | [0.0856]                     |          | [0.2561]                     |          | [0.6321]                     |          | [0.6860]                     |          | [0.1339]                     |          |
|                | <b>Quadru<br/>ple<sup>TM1,7</sup></b> | 9.0 ± 0.1<br>(1.08)                                   | 3        | 6.8 ± 0.2                    | 3        | 6.7 ± 0.3                    | 3        | 7.1 ± 0.4                    | 3        | 9.2 ± 0.1                    | 3        | 5.6 ± 0.3                    | 3        | <5                           | 3        |
|                |                                       |                                                       |          | [0.1776]                     |          | [0.0916]                     |          | [0.3843]                     |          | [0.9927]                     |          | [0.3218]                     |          |                              |          |

Mutations are shown in the numbering of the cannabinoid CB<sub>2</sub> receptor (CB<sub>2</sub>R) amino acid sequence as well as the Ballesteros and Weinstein GPCR numbering system. <sup>a,b</sup> Binding affinities (pK<sub>D</sub>, pK<sub>i</sub>) were determined in [<sup>3</sup>H]CP55,940 displacement assays on HEK293T membranes transiently expressing CB<sub>2</sub>R constructs. pK<sub>i</sub> <5 was reported when the curve fit was not finished. All values are presented as the mean ± SEM of at least three independent experiments performed in duplicate (*n* indicates the number of biological replicates). One-way Welch ANOVA with Dunnett's T3 posthoc test was used to analyze differences in pK<sub>i</sub> values compared to WT (\*p < 0.05, \*\* p < 0.01, \*\*\* p < 0.001). Exact p values are given between square brackets. Mutations I110<sup>3,29</sup>L, S285<sup>7,39</sup>A, F117<sup>3,36</sup>A, H95<sup>2,65</sup>A, V261<sup>6,51</sup>L, L185<sup>ECL2</sup>I and E181<sup>ECL2</sup>D could not be assessed due to lack of specific binding window. Source data are provided as a Source Data file.

**Supplementary Table 8. Characterization of cannabinoid CB<sub>1</sub> receptor mutations in G protein activation assays**

|                | Construct                  | Basal <sup>a</sup>      | LEI-102                | APD371                 | HU308                  | CP55,940               | AEA                   | 2-AG                   | <i>n</i> |
|----------------|----------------------------|-------------------------|------------------------|------------------------|------------------------|------------------------|-----------------------|------------------------|----------|
|                | WT                         | 1.0 ± 0.0               | 1.0 ± 0.1              | 1.0 ± 0.0              | 0.8 ± 0.0              | 1.2 ± 0.1              | 1.2 ± 0.1             | 1.3 ± 0.1              | 3        |
| Binding pocket | L193 <sup>3,29</sup> I     | n.d.                    | n.d.                   | n.d.                   | n.d.                   | n.d.                   | n.d.                  | n.d.                   | n.d.     |
|                | L359 <sup>6,51</sup> V     | 0.7 ± 0.0*<br>[0.0218]  | 1.1 ± 0.1<br>[0.8066]  | 1.1 ± 0.1<br>[0.5608]  | 0.9 ± 0.1<br>[0.6307]  | 1.4 ± 0.2<br>[0.9142]  | 1.4 ± 0.2<br>[0.8892] | 1.4 ± 0.2<br>[0.9084]  | 3        |
| Ligand entry   | H270 <sup>ECL2</sup> L     | 0.7 ± 0.0**<br>[0.0043] | 1.2 ± 0.0<br>[0.3066]  | 1.1 ± 0.0<br>[0.2564]  | 1.2 ± 0.1*<br>[0.0273] | 1.6 ± 0.1<br>[0.1137]  | 1.4 ± 0.1<br>[0.5125] | 1.5 ± 0.1<br>[0.3614]  | 3        |
|                | I267 <sup>ECL2</sup> L     | 1.1 ± 0.0<br>[0.5812]   | 1.0 ± 0.0<br>[>0.9999] | 0.9 ± 0.0<br>[0.9284]  | 0.8 ± 0.0<br>[>0.9999] | 1.0 ± 0.0<br>[0.0841]  | 1.0 ± 0.1<br>[0.6959] | 1.1 ± 0.0<br>[0.6278]  | 3        |
|                | D266 <sup>ECL2</sup> E     | 0.7 ± 0.0**<br>[0.0042] | 1.1 ± 0.1<br>[0.8927]  | 0.9 ± 0.1<br>[>0.9999] | 0.8 ± 0.1<br>[>0.9999] | 1.4 ± 0.1<br>[0.8747]  | 1.3 ± 0.1<br>[0.8924] | 1.5 ± 0.2<br>[0.8847]  | 3        |
|                | Quadruple <sup>TM1,7</sup> | 0.6 ± 0.1**<br>[0.0027] | 1.2 ± 0.1<br>[0.2854]  | 1.1 ± 0.0<br>[0.1501]  | 0.9 ± 0.0<br>[0.4063]  | 1.8 ± 0.1*<br>[0.0394] | 1.6 ± 0.1<br>[0.1379] | 1.8 ± 0.1*<br>[0.0490] | 3        |

Mutations are shown in the numbering of the cannabinoid CB<sub>1</sub> receptor (CB<sub>1</sub>R) amino acid sequence as well as the Ballesteros and Weinstein GPCR numbering system. <sup>a</sup> Basal activity is expressed as fold over WT. Agonist-mediated activation values were obtained from [<sup>35</sup>S]GTPγS assays on HEK293T membranes transiently expressing CB<sub>1</sub>R constructs using 10 μM agonist, and are expressed as fold over its basal. Values are presented as the mean ± SEM of three independent experiments performed in duplicate (*n* indicates the number of biological replicates). One-way Welch ANOVA with Dunnett's T3 posthoc test was used to analyze differences in activation values compared to WT (\**p* < 0.05, \*\* *p* < 0.01, \*\*\* *p* < 0.001, \*\*\*\* *p* < 0.00001). Exact *p* values are given between square brackets. n.d. is not determined. Source data are provided as a Source Data file.
